# Supplementary material for: Dissolution of cobalt and zinc from natural and anthropogenic dusts in seawater
Source: Copernicus journal article supplement (doi:10.5194/bg-7-1927-2010), 2010-06-17
Supplement: Supplementary file 1 [file bg-7-1927-2010-supplement.pdf]

**Annexe 1: Blank concentrations of cobalt without reactor and from the reactor**

| <b>Blank without reactor</b>  |              |              |
|-------------------------------|--------------|--------------|
| Sample                        | [Co] nM      |              |
| 1                             | 0.055        |              |
| 2                             | 0.022        |              |
| 3                             | 0.126        |              |
| <b>Avg/Stdev</b>              | <b>0.068</b> | <b>0.053</b> |
| <b>Blank from the reactor</b> |              |              |
| Intermediate time (min)       | [Co] nM      |              |
| 5.5                           | 0.055        |              |
| 9.5                           | 0.014        |              |
| 11.5                          | 0.074        |              |
| 17.5                          | 0.101        |              |
| 27.5                          | 0.093        |              |
| 37.5                          | 0.040        |              |
| 52.5                          | 0.045        |              |
| 67.5                          | 0.088        |              |
| <b>Avg/Stdev</b>              | <b>0.065</b> | <b>0.033</b> |

**Annexe 2:** Elemental composition of the coal dust and loess samples determined by ICP-AES (mg/g).

| <b>Elemental composition (µg/g)</b> |                |                  |                 |
|-------------------------------------|----------------|------------------|-----------------|
| <b>Loess</b>                        |                | <b>Coal dust</b> |                 |
| <b>Al</b>                           | <b>70460.6</b> | <b>Al</b>        | <b>106362.8</b> |
| <b>Fe</b>                           | <b>69149.6</b> | <b>Fe</b>        | <b>61983.5</b>  |
| Mg                                  | 26168.3        | K                | 38659.5         |
| K                                   | 25989.8        | Mg               | 17515.6         |
| Ca                                  | 24979.6        | Ca               | 15512.5         |
| Ti                                  | 18070.3        | Ti               | 5303.6          |
| Na                                  | 12485.1        | S                | 3946.0          |
| P                                   | 2946.4         | Na               | 3681.6          |
| Mn                                  | 1279.8         | P                | 1329.5          |
| Ba                                  | 565.9          | Ba               | 1289.0          |
| S                                   | 519.5          | Mn               | 764.9           |
| Zr                                  | 299.8          | <b>Zn</b>        | <b>744.2</b>    |
|                                     |                | Si               | 608.7           |
| Sr                                  | 276.9          | Sr               | 597.1           |
| V                                   | 216.3          | Ni               | 430.8           |
| Cr                                  | 189.9          | V                | 395.3           |
| <b>Co</b>                           | <b>181.8</b>   | Rb               | 250.6           |
| Rb                                  | 137.7          | Cr               | 222.4           |
| <b>Zn</b>                           | <b>102.4</b>   | Pb               | 217.1           |
| Ni                                  | 67.7           | <b>Co</b>        | <b>212.8</b>    |
| Pb                                  | 65.0           | Cu               | 210.9           |
| Cu                                  | 53.0           | Zr               | 191.7           |
| Sc                                  | 33.5           | Li               | 153.5           |
| Li                                  | 19.5           | Sc               | 30.2            |
| Cd                                  | 10.7           | Ge               | 15.7            |
| Ge                                  | 4.6            | Be               | 13.6            |
| Be                                  | 2.4            | Cd               | 9.3             |

**Annexe 3:** Cobalt from coal dust with and without light irradiation.  $[Co]_{out}$ : Cobalt concentration measured at the exit of the reactor;  $[Co]_{in}$ : Cobalt concentration naturally present in the seawater used for the dissolution experiments. These concentrations are corrected from the blank concentrations. To obtain the dissolution rate in nmol/min instead of %/min, the dissolution in %/min has to be multiplied by the bulk concentration of the selected dust (*cf.* Table 2).

| <b>Coal dust in the dark</b>            |                                                                      |              |                                 |                       |                       |                       |
|-----------------------------------------|----------------------------------------------------------------------|--------------|---------------------------------|-----------------------|-----------------------|-----------------------|
| <b>Intermediate time (min)</b>          | <b><math>[Co]_{out} - [Co]_{in}</math> (nM) corrected from blank</b> | <b>Stdev</b> | <b>Dissolution rate (%/min)</b> | <b>Absolute error</b> | <b>Solubility (%)</b> | <b>Absolute error</b> |
| 3                                       | 1.898                                                                | 0.022        | 0.048%                          | 0.003%                | 0.19%                 | 0.01%                 |
| 6                                       | 1.799                                                                | 0.039        | 0.029%                          | 0.011%                | 0.27%                 | 0.02%                 |
| 8                                       | 2.108                                                                | 0.043        | 0.056%                          | 0.017%                | 0.36%                 | 0.04%                 |
| 10                                      | 1.505                                                                | 0.022        | -0.002%                         | 0.014%                | 0.41%                 | 0.05%                 |
| 12                                      | 1.127                                                                | 0.121        | 0.002%                          | 0.011%                | 0.41%                 | 0.05%                 |
| 15                                      | 0.999                                                                | 0.043        | 0.012%                          | 0.008%                | 0.42%                 | 0.05%                 |
| 21                                      | 0.385                                                                | 0.035        | 0.001%                          | 0.003%                | 0.48%                 | 0.05%                 |
| 31                                      | 0.282                                                                | 0.030        | 0.004%                          | 0.002%                | 0.51%                 | 0.05%                 |
| 43.5                                    | 0.239                                                                | 0.124        | 0.004%                          | 0.002%                | 0.56%                 | 0.05%                 |
| 58.5                                    | 0.173                                                                | 0.022        | 0.002%                          | 0.001%                | 0.61%                 | 0.05%                 |
| 81                                      | 0.051                                                                | 0.022        | 0.000%                          | 0.001%                | 0.64%                 | 0.06%                 |
| 111                                     | 0.346                                                                | 0.021        | 0.006%                          | 0.001%                | <b>0.73%</b>          | 0.06%                 |
| <b>Coal dust with light irradiation</b> |                                                                      |              |                                 |                       |                       |                       |
| 3.15                                    | 2.556                                                                | 0.026        | 0.061%                          | 0.004%                | 0.26%                 | 0.01%                 |
| 6.3                                     | 2.512                                                                | 0.000        | 0.044%                          | 0.014%                | 0.37%                 | 0.03%                 |
| 8.3                                     | 1.482                                                                | 0.118        | -0.024%                         | 0.014%                | 0.39%                 | 0.04%                 |
| 10.3                                    | 1.422                                                                | 0.173        | 0.024%                          | 0.013%                | 0.38%                 | 0.05%                 |
| 12.3                                    | 1.288                                                                | 0.185        | 0.018%                          | 0.012%                | 0.43%                 | 0.05%                 |
| 15.3                                    | 0.930                                                                | 0.022        | -0.001%                         | 0.007%                | 0.44%                 | 0.04%                 |
| 21.3                                    | 0.461                                                                | 0.029        | 0.004%                          | 0.003%                | 0.46%                 | 0.05%                 |
| 31.3                                    | 0.205                                                                | 0.073        | 0.001%                          | 0.002%                | 0.48%                 | 0.05%                 |
| 43.8                                    | 0.295                                                                | 0.067        | 0.006%                          | 0.002%                | 0.53%                 | 0.05%                 |
| 58.8                                    | 0.276                                                                | 0.016        | 0.004%                          | 0.002%                | 0.60%                 | 0.05%                 |
| 81.3                                    | 0.211                                                                | 0.062        | 0.003%                          | 0.001%                | 0.71%                 | 0.06%                 |
| 111.3                                   | 0.178                                                                | 0.030        | 0.002%                          | 0.001%                | <b>0.78%</b>          | 0.06%                 |

| <b>Loess in the dark</b>            |                                                                             |              |                                     |                           |                           |                           |
|-------------------------------------|-----------------------------------------------------------------------------|--------------|-------------------------------------|---------------------------|---------------------------|---------------------------|
| <b>Intermediate time<br/>(min)</b>  | <b>[Co]<sub>out</sub> - [Co]<sub>in</sub> (nM)<br/>corrected from blank</b> | <b>Stdev</b> | <b>Dissolution rate<br/>(%/min)</b> | <b>Absolute<br/>error</b> | <b>Solubility<br/>(%)</b> | <b>Absolute<br/>error</b> |
| 3.25                                | 0.094                                                                       | 0.025        | 0.003%                              | 0.001%                    | 0.01%                     | 0.00%                     |
| 6.5                                 | < DL                                                                        | 0.053        | 0.000%                              | 0.003%                    | 0.01%                     | 0.00%                     |
| 8.5                                 | < DL                                                                        | 0.016        | 0.000%                              | 0.005%                    | 0.00%                     | 0.01%                     |
| 10.5                                | < DL                                                                        | 0.004        | 0.000%                              | 0.006%                    | 0.00%                     | 0.02%                     |
| 12.5                                | < DL                                                                        | 0.006        | 0.000%                              | 0.005%                    | 0.00%                     | 0.02%                     |
| 15.5                                | < DL                                                                        | 0.063        | 0.000%                              | 0.004%                    | 0.00%                     | 0.02%                     |
| 21.5                                | 0.046                                                                       | 0.057        | 0.001%                              | 0.002%                    | 0.01%                     | 0.03%                     |
| 31.5                                | 0.072                                                                       | 0.026        | 0.002%                              | 0.002%                    | 0.02%                     | 0.03%                     |
| 44                                  | 0.093                                                                       | 0.134        | 0.002%                              | 0.002%                    | 0.05%                     | 0.04%                     |
| 81.5                                | 0.088                                                                       | 0.043        | 0.002%                              | 0.001%                    | 0.07%                     | 0.05%                     |
| 112                                 | 0.206                                                                       | 0.038        | 0.003%                              | 0.001%                    | <b>0.14%</b>              | 0.06%                     |
| <b>Loess with light irradiation</b> |                                                                             |              |                                     |                           |                           |                           |
| 3                                   | 0.106                                                                       | 0.034        | 0.003%                              | 0.001%                    | 0.01%                     | 0.00%                     |
| 6                                   | 0.158                                                                       | 0.067        | 0.007%                              | 0.005%                    | 0.02%                     | 0.01%                     |
| 8                                   | 0.078                                                                       | 0.020        | -0.003%                             | 0.006%                    | 0.03%                     | 0.01%                     |
| 10                                  | 0.108                                                                       | 0.062        | 0.004%                              | 0.006%                    | 0.03%                     | 0.02%                     |
| 12                                  | 0.131                                                                       | 0.032        | 0.004%                              | 0.006%                    | 0.03%                     | 0.02%                     |
| 15                                  | 0.121                                                                       | 0.047        | 0.002%                              | 0.004%                    | 0.04%                     | 0.02%                     |
| 31                                  | 0.008                                                                       | 0.004        | 0.000%                              | 0.002%                    | 0.04%                     | 0.03%                     |
| 43.5                                | 0.070                                                                       | 0.042        | 0.002%                              | 0.002%                    | 0.05%                     | 0.04%                     |
| 81                                  | 0.066                                                                       | 0.145        | 0.001%                              | 0.001%                    | 0.07%                     | 0.05%                     |
| 111                                 | 0.194                                                                       | 0.030        | 0.003%                              | 0.001%                    | <b>0.14%</b>              | 0.06%                     |

**Annexe 4:** Zinc from coal dust with and without light irradiation.  $[Zn]_{out}$ : Zinc concentration measured at the exit of the reactor;  $[Zn]_{in}$ : Zinc concentration naturally present in the seawater used for the dissolution experiments. These concentrations are corrected from the blank concentrations. To obtain the dissolution rate in nmol/min instead of %/min, the dissolution in %/min has to be multiplied by the bulk concentration of the selected dust (*cf.* Table 2).

| <b>Coal dust with light irradiation</b> |                                                                          |              |                                     |                           |                           |                           |
|-----------------------------------------|--------------------------------------------------------------------------|--------------|-------------------------------------|---------------------------|---------------------------|---------------------------|
| <b>Intermediate time<br/>(min)</b>      | <b><math>[Zn]_{out} - [Zn]_{in}</math> (nM)<br/>corrected from blank</b> | <b>Stdev</b> | <b>Dissolution rate<br/>(%/min)</b> | <b>Absolute<br/>error</b> | <b>Solubility<br/>(%)</b> | <b>Absolute<br/>error</b> |
| 3.2                                     | 39.898                                                                   | 1.262        | 0.300%                              | 0.016%                    | 1.29%                     | 0.06%                     |
| 6.3                                     | 27.905                                                                   | 1.280        | -0.031%                             | 0.041%                    | 1.56%                     | 0.10%                     |
| 8.3                                     | 28.466                                                                   | 1.401        | 0.183%                              | 0.061%                    | 1.71%                     | 0.16%                     |
| 10.3                                    | 23.627                                                                   | 1.401        | 0.062%                              | 0.051%                    | 1.96%                     | 0.18%                     |
| 12.3                                    | 17.442                                                                   | 0.821        | 0.006%                              | 0.040%                    | 2.03%                     | 0.18%                     |
| 15.3                                    | 13.984                                                                   | 0.706        | 0.026%                              | 0.024%                    | 2.06%                     | 0.16%                     |
| 21.3                                    | 5.162                                                                    | 0.238        | 0.002%                              | 0.007%                    | 2.20%                     | 0.16%                     |
| 31.3                                    | 6.834                                                                    | 0.104        | 0.044%                              | 0.006%                    | 2.42%                     | 0.16%                     |
| 43.8                                    | 7.718                                                                    | 0.402        | 0.043%                              | 0.006%                    | 3.07%                     | 0.17%                     |
| 58.8                                    | 5.821                                                                    | 0.535        | 0.024%                              | 0.004%                    | 3.58%                     | 0.16%                     |
| 81.3                                    | 6.466                                                                    | 0.179        | 0.031%                              | 0.004%                    | 4.41%                     | 0.19%                     |
| 111.3                                   | 5.382                                                                    | 0.104        | 0.019%                              | 0.003%                    | <b>5.16%</b>              | 0.19%                     |
| <b>Loess with light irradiation</b>     |                                                                          |              |                                     |                           |                           |                           |
| 3.0                                     | 2.749                                                                    | 0.195        | 0.162%                              | 0.018%                    | 0.65%                     | 0.03%                     |
| 6.0                                     | 4.453                                                                    | 0.148        | 0.395%                              | 0.077%                    | 1.20%                     | 0.13%                     |
| 8.0                                     | 0.533                                                                    | 0.419        | -0.442%                             | 0.051%                    | 1.16%                     | 0.16%                     |
| 10.0                                    | 0.301                                                                    | 0.128        | -0.014%                             | 0.049%                    | 0.70%                     | 0.18%                     |
| 12.0                                    | 0.775                                                                    | 0.164        | 0.089%                              | 0.055%                    | 0.78%                     | 0.20%                     |
| 15.0                                    | 0.733                                                                    | 0.015        | 0.026%                              | 0.039%                    | 0.89%                     | 0.20%                     |
| 21.0                                    | 1.662                                                                    | 0.155        | 0.088%                              | 0.029%                    | 1.46%                     | 0.34%                     |
| 31.0                                    | 1.676                                                                    | 0.140        | 0.060%                              | 0.020%                    | 2.20%                     | 0.38%                     |
| 43.5                                    | 2.777                                                                    | 0.275        | 0.111%                              | 0.021%                    | 3.48%                     | 0.49%                     |
| 58.5                                    | 4.643                                                                    | 0.024        | 0.181%                              | 0.025%                    | 5.67%                     | 0.61%                     |
| 81.0                                    | 4.951                                                                    | 0.131        | 0.162%                              | 0.022%                    | 10.81%                    | 0.88%                     |
| 111.0                                   | 7.097                                                                    | 0.203        | 0.202%                              | 0.022%                    | <b>16.27%</b>             | 1.07%                     |
